# Supplementary material for: Improvement in the thermoelectric performance of highly reproducible n-type (Bi,Sb)2Se3 alloys by Cl-doping
Source: Royal Society of Chemistry journal article supplement (doi:10.1039/d0ra04065g), 2020-01-01
Supplement: d0ra04065g1.pdf [file d0ra04065g1.pdf]

## Electronic Supporting Information

### Improvement in the thermoelectric performance of highly reproducible *n*-type (Bi,Sb)<sub>2</sub>Se<sub>3</sub> alloys by Cl-doping

Nadra Nasir<sup>a,†</sup>, Kyu Hyoung Lee<sup>b,†</sup>, Sang-il Kim<sup>c</sup>, Hyun-Sik Kim<sup>d</sup>, Jae-Hong Lim<sup>e</sup>, Liangwei Fu<sup>a,\*</sup>, Sung Wng Kim<sup>a,e,\*</sup>

#### 1. The lattice parameters of Cl-doped BiSbSe<sub>3</sub>.

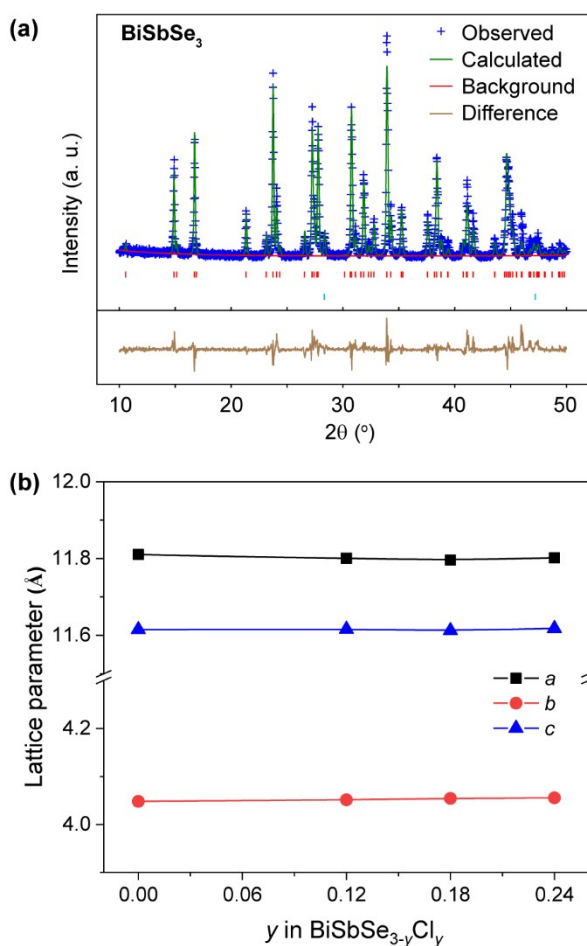

**Figure S1.** (a) One typical XRD refinement result of BiSbSe<sub>3</sub> sample. (b) The change in lattice parameters (*a*, *b*, and *c*) of orthorhombic BiSbSe<sub>3</sub> by Cl-doping.

2. Microstructure analysis for the SPSed  $\text{BiSbSe}_{3-y}\text{Cl}_y$  ( $y = 0, 0.12, 0.18, 0.24$ ) and  $\text{Bi}_{1.2}\text{Sb}_{0.8}\text{Se}_{3-z}\text{Cl}_z$  ( $z = 0, 0.12, 0.18, 0.24$ ) samples.

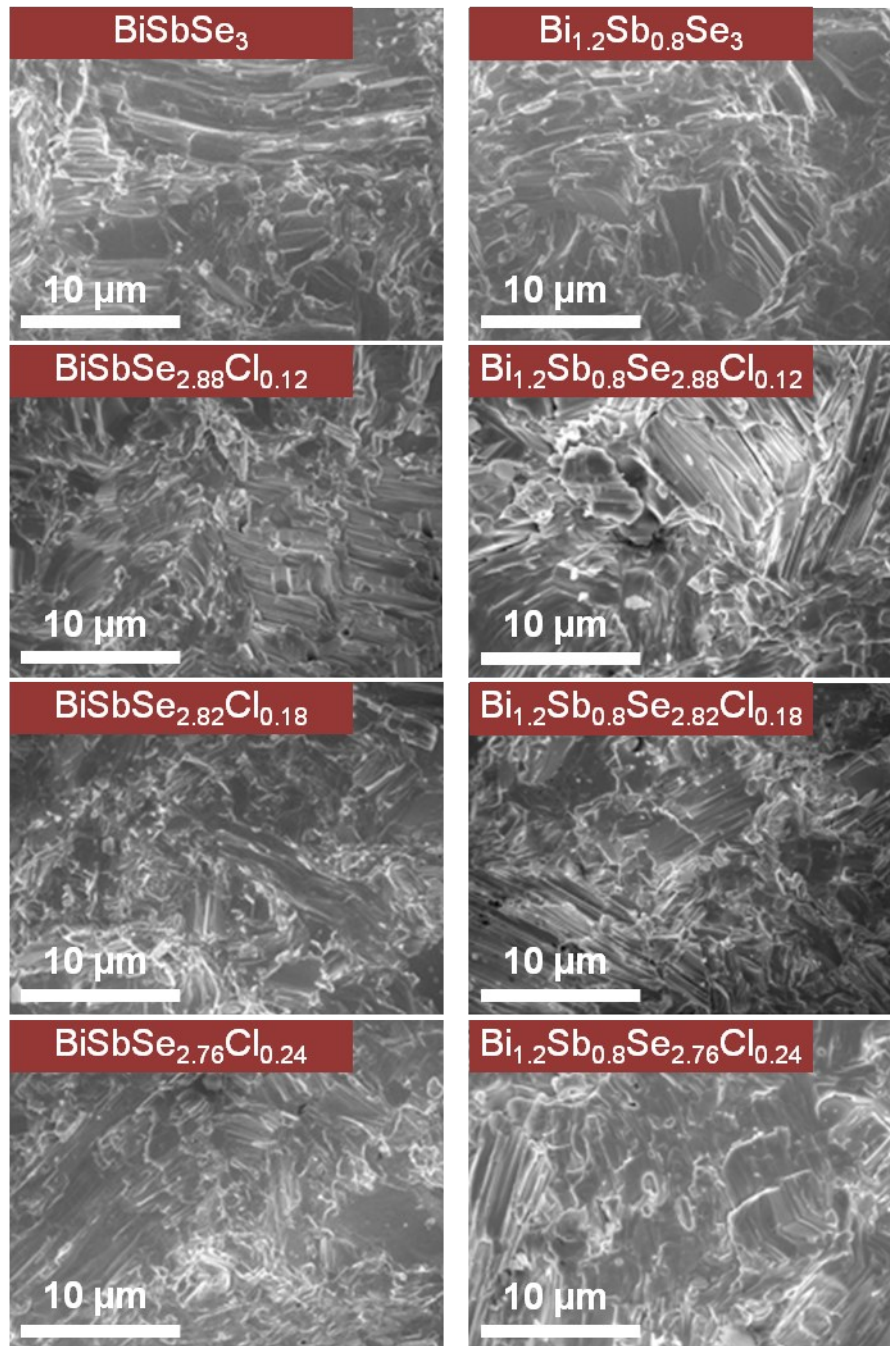

**Figure S2.** SEM images of fractured surfaces for the SPSed  $\text{BiSbSe}_{3-y}\text{Cl}_y$  ( $y = 0, 0.12, 0.18, 0.24$ ) and  $\text{Bi}_{1.2}\text{Sb}_{0.8}\text{Se}_{3-z}\text{Cl}_z$  ( $z = 0, 0.12, 0.18, 0.24$ ).

**3. The mole fraction of rhombohedral phase in  $\text{Bi}_{1.2}\text{Sb}_{0.8}\text{Se}_{3-z}\text{Cl}_z$  ( $z = 0, 0.12, 0.18, 0.24$ ).**

**Table S1.** The mole fraction of rhombohedral phase in  $\text{Bi}_{1.2}\text{Sb}_{0.8}\text{Se}_{3-z}\text{Cl}_z$  ( $z = 0, 0.12, 0.18, 0.24$ ), which is calculated by Rietveld refinement. The relative densities of the samples measured by the Archimedes principle (AlfaMiracle, MD-300S) are also shown.

| Compositions (nominal)                                           | Mole fraction |              | Relative density (%) |
|------------------------------------------------------------------|---------------|--------------|----------------------|
|                                                                  | Rhombohedral  | Orthorhombic |                      |
| $\text{Bi}_{1.2}\text{Sb}_{0.8}\text{Se}_3$                      | 0.743         | 0.257        | 97.4%                |
| $\text{Bi}_{1.2}\text{Sb}_{0.8}\text{Se}_{2.88}\text{Cl}_{0.12}$ | 0.744         | 0.256        | 97.4%                |
| $\text{Bi}_{1.2}\text{Sb}_{0.8}\text{Se}_{2.82}\text{Cl}_{0.18}$ | 0.745         | 0.255        | 95.5%                |
| $\text{Bi}_{1.2}\text{Sb}_{0.8}\text{Se}_{2.76}\text{Cl}_{0.24}$ | 0.747         | 0.253        | 97.1%                |

#### 4. The lattice parameters of Cl-doped $\text{Bi}_{1.2}\text{Sb}_{0.8}\text{Se}_3$ .

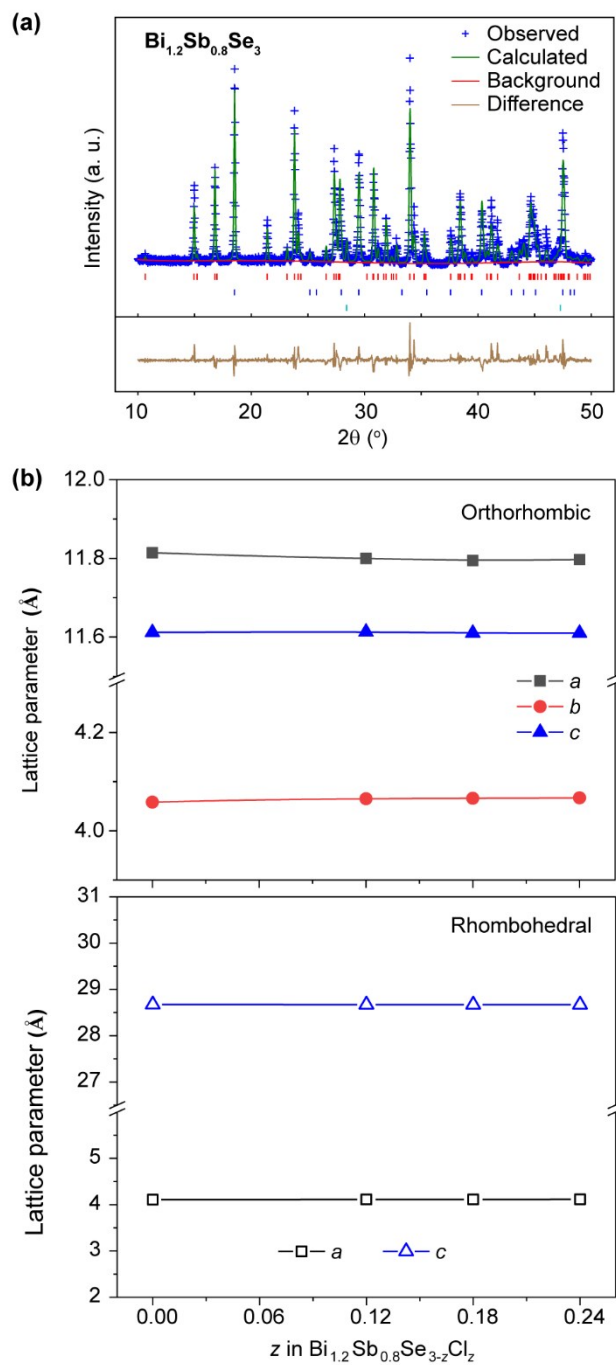

**Figure S3.** (a) One typical XRD refinement result of  $\text{Bi}_{1.2}\text{Sb}_{0.8}\text{Se}_3$  sample. (b) The change in lattice parameters of rhombohedral ( $a$  and  $c$ ) and orthorhombic ( $a$ ,  $b$ , and  $c$ ) phases of  $\text{Bi}_{1.2}\text{Sb}_{0.8}\text{Se}_3$  by Cl-doping.

## 5. Phase formation in $\text{Bi}_{1.2}\text{Sb}_{0.8}\text{Se}_{2.7}\text{Cl}_{0.3}$ .

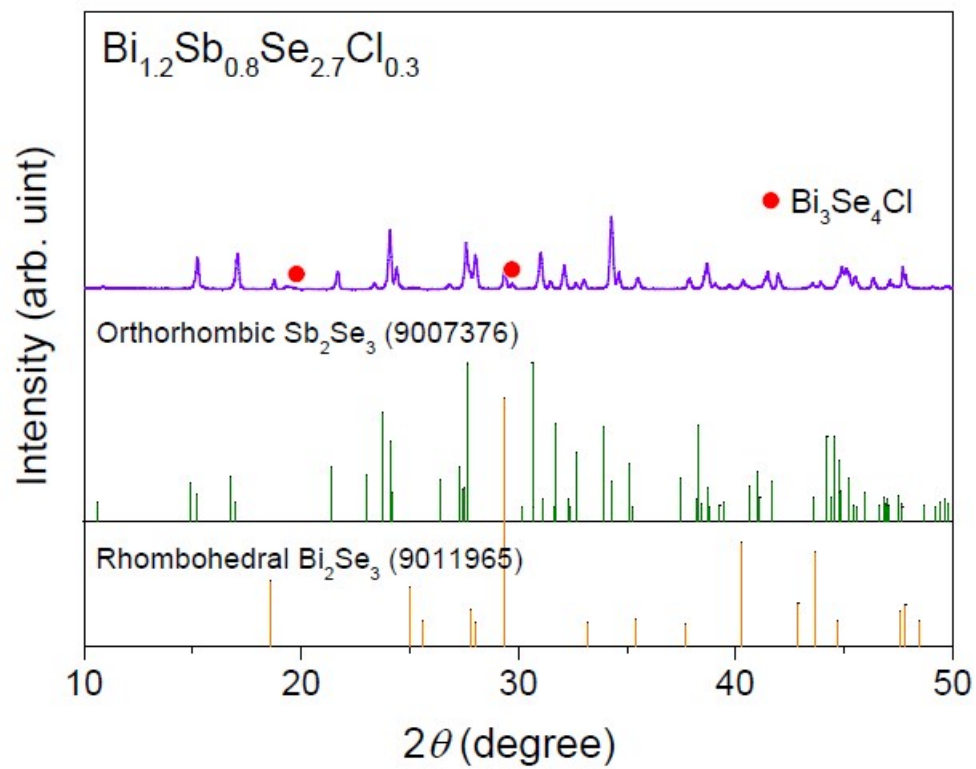

**Figure S4.** XRD pattern of SPSed  $\text{Bi}_{1.2}\text{Sb}_{0.8}\text{Se}_{2.7}\text{Cl}_{0.3}$ .

## 6. Calculation of electronic thermal conductivity

The electronic thermal conductivity ( $\kappa_{ele}$ ) is estimated by the Wiedemann-Franz law ( $\kappa_{ele} = L\sigma T$ , where  $L$ ,  $\sigma$ , and  $T$  are the Lorenz number, electrical conductivity, and the absolute temperature). Temperature dependent  $L$  is obtained by using Eq. S1 assuming a single parabolic band model [1].

$$L = 1.5 + \exp\left(-\frac{|S|}{116}\right) \quad (S1)$$

Figure S5 shows the temperature dependences of  $L$  for Cl-doped  $\text{BiSbSe}_3$  and  $\text{Bi}_{1.2}\text{Sb}_{0.8}\text{Se}_3$ .

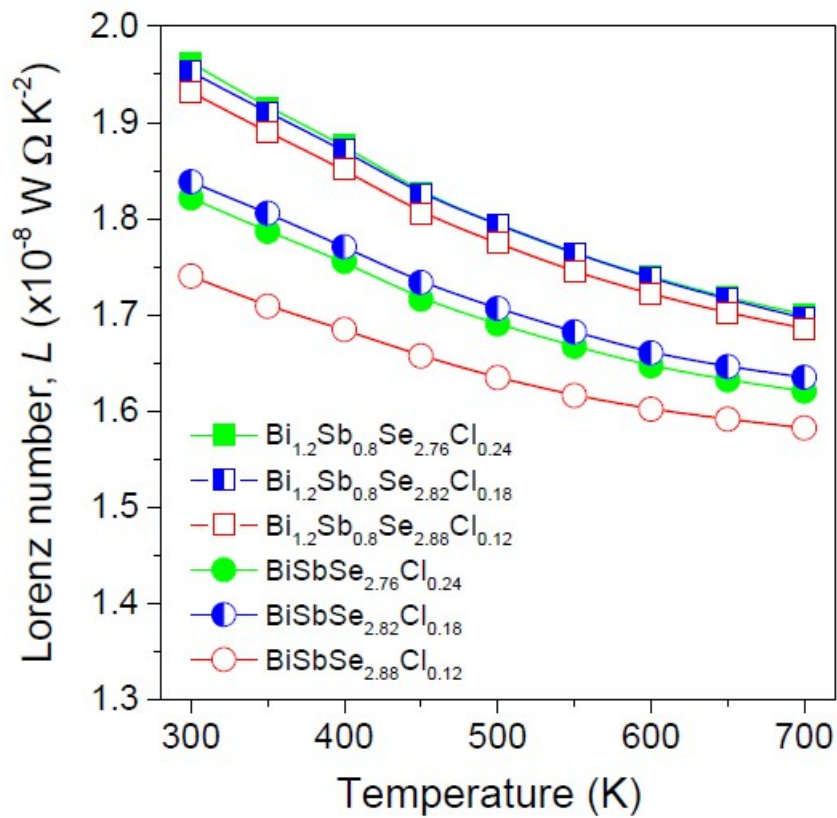

**Figure S5.** Temperature dependences of  $L$  for Cl-doped  $\text{BiSbSe}_3$  and  $\text{Bi}_{1.2}\text{Sb}_{0.8}\text{Se}_3$ .

## References

- [1] H. S. Kim, Z. M. Gibbs, Y. Tang, H. Wang, and G. J. Snyder, *APL Mater.* 3 (2015) 041506.
